# Supplementary material for: Safflower Flavonoid 3′5′Hydroxylase Promotes Methyl Jasmonate-Induced Anthocyanin Accumulation in Transgenic Plants
Source: MDPI journal article supplement (doi:10.3390/molecules28073205), 2023-04-04
Supplement: s1 [file s1]

# Supplementary Figures and Tables

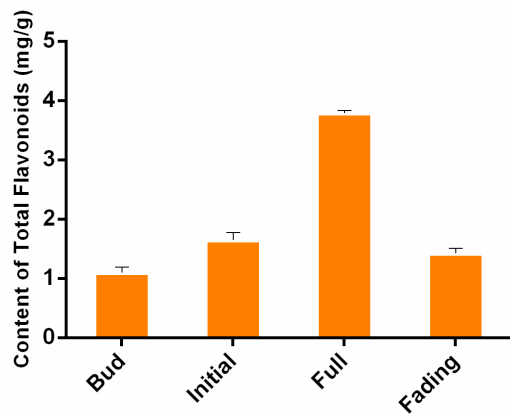

**Figure S1.** The total flavonoids content in different flowering periods (bud, initial, full and fading).

|     |            |            |
|-----|------------|------------|
| 1   | MTPNFGDKIY | ISMINLWSWW |
| 21  | WQADNHQDHV | ARTILTVSVP |
| 41  | LLVFLWYQLT | ELYIKKGRTF |
| 61  | LPPGPYGLPV | VGYPFLSSD  |
| 81  | VHERFTHMSH | RYGPIFSLWL |
| 101 | GSKLHVVVNS | MDLARVVARD |
| 121 | RDQTFANRNP | PITALTITSG |
| 141 | APDVVWSSNN | AHWRGMRKLL |
| 161 | VSQVLSNANL | NSCAGFRTDA |
| 181 | VRKAVREYVG | RIGERIDINK |
| 201 | VAFDAELNVV | TGMLWGCCDW |
| 221 | KGSSDVIGEG | FREVEFKIIE |
| 241 | LMGAPNVSDF | FPMLSWFDLQ |
| 261 | GREREMRKQT | EHLHRIVDKI |
| 281 | IGGRSNGNFR | KIGEDERKDF |
| 301 | VQILLELKEQ | KDGSISIEQI |
| 321 | KGLLFDILIA | TTDTTSTMAE |
| 341 | WVMTEILHHP | DVKTKIQEEL |
| 361 | NDVLGMNNIV | EECHLGKLTQ |
| 381 | LDAVIKETFR | IHSPLPLLIP |
| 401 | RCPDEPCTVG | GYLIPKGTIV |
| 421 | YINVWAIHRD | PKNWSEPLKF |
| 441 | KPERFLNGKW | DYSGNNLKFL |
| 461 | PFGVGRRICP | GIQLGEKMLV |
| 481 | YILASLLHSF | EWGLPKGEDF |
| 501 | EVSDEFGFVT | KKRKPLIAIP |
| 521 | SQRLSNTNLY | L*         |

**Figure S2.** Amino-acid sequence of the CtF3'5'H1 protein.

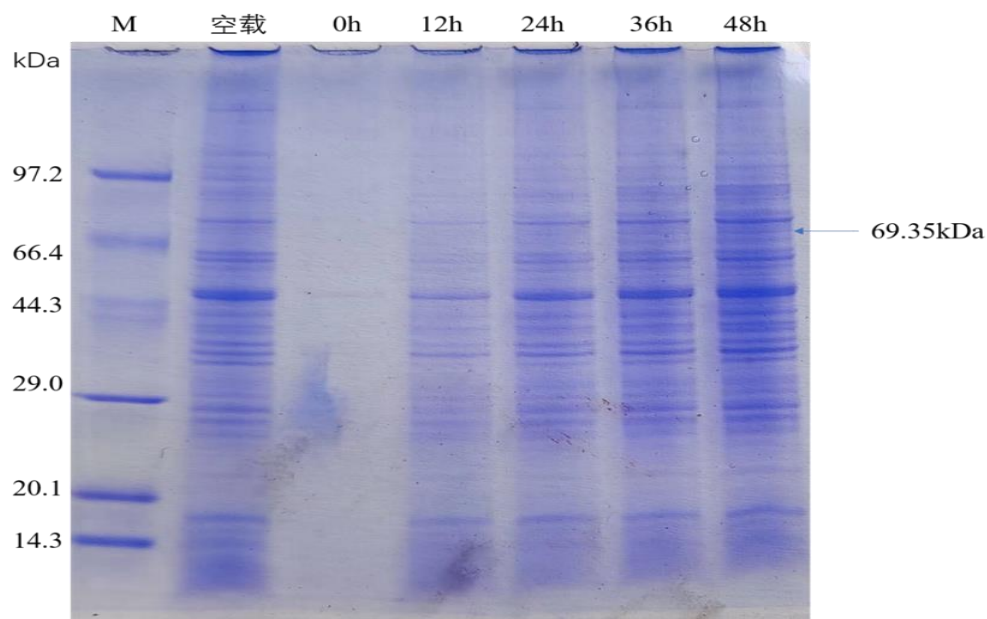

**Figure S3.** SDS-PAGE image of recombinant CtF3'5'H1. First line is Protein marker; the second is the empty vector; 0 hour, 24 hours, 36 hours, 48hours.

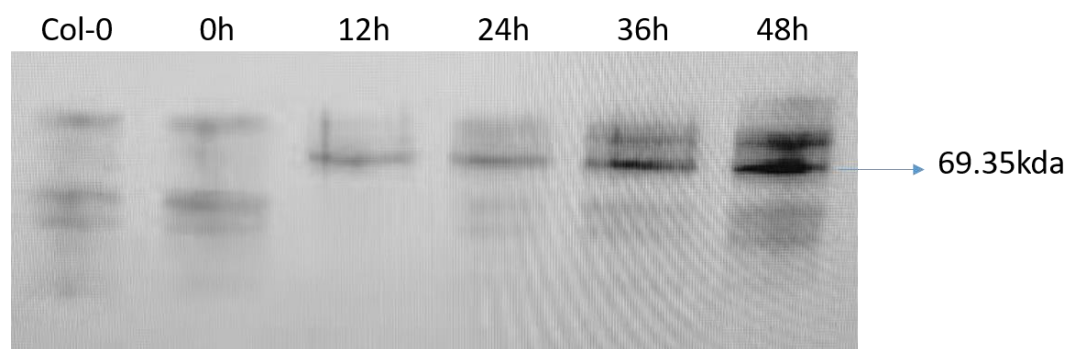

**Figure S4.** Part of Western Blot validation diagram. Figure S2. First line is the empty vector; the second is 0 hours, next to 12h, 24h, 36h, 48h. There are specific bands at 69.35kDa.

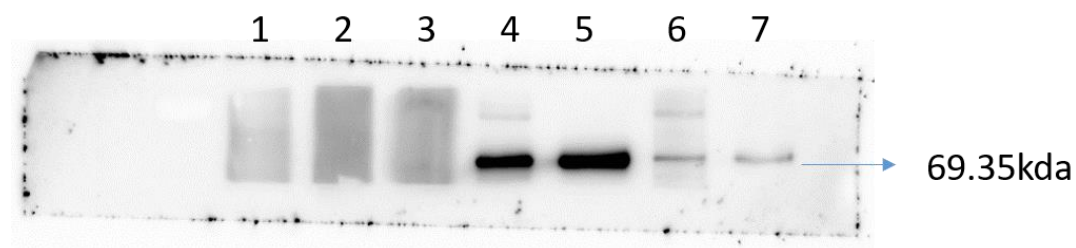

**Figure S5.** Detection after purification. 1: protein marker (10~170kDa). 2: col-0(the empty vector). 3: 0h. 4,6: binding buffer. 5,7: elution buffer

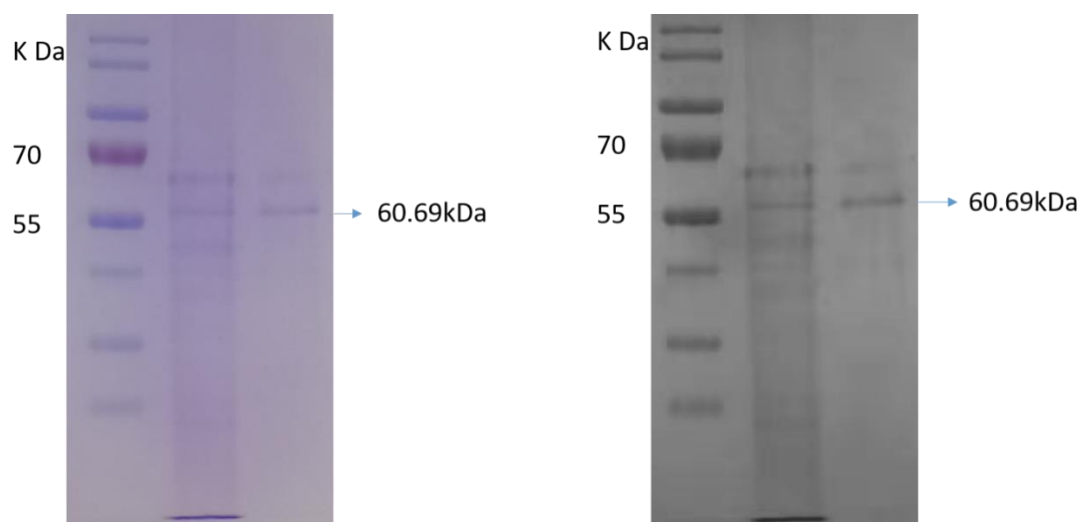

**Figure S6.** Purification by SDS. The size of the purified protein is the same as that after the removal of two his tags. There is only the clearest one, and the size is 60.69 kDa.

**a**

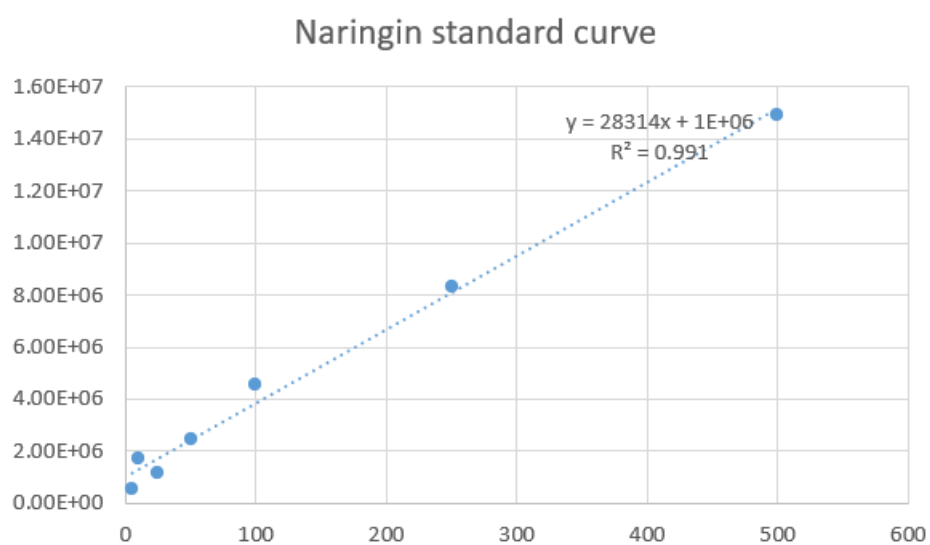

b

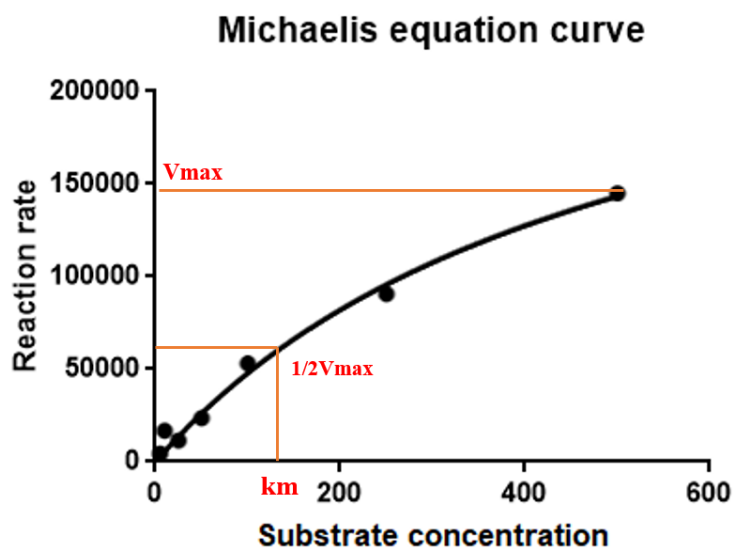

**Figure S7.** The Naringin standard curve and Enzyme kinetic curve.

As shown in the figure a, the standard curve of the peak area produced by the external standard method for different concentrations of substrates is shown. Abscissa represents substrate the concentration, ordinate represents peak area. ( $R^2= 0.991$ .) As shown in the figure b, the Abscissa is the substrate concentration, the ordinate is the reaction rate, and the maximum reaction rate and the substrate concentration when the maximum reaction rate is half of the maximum reaction rate have been marked.

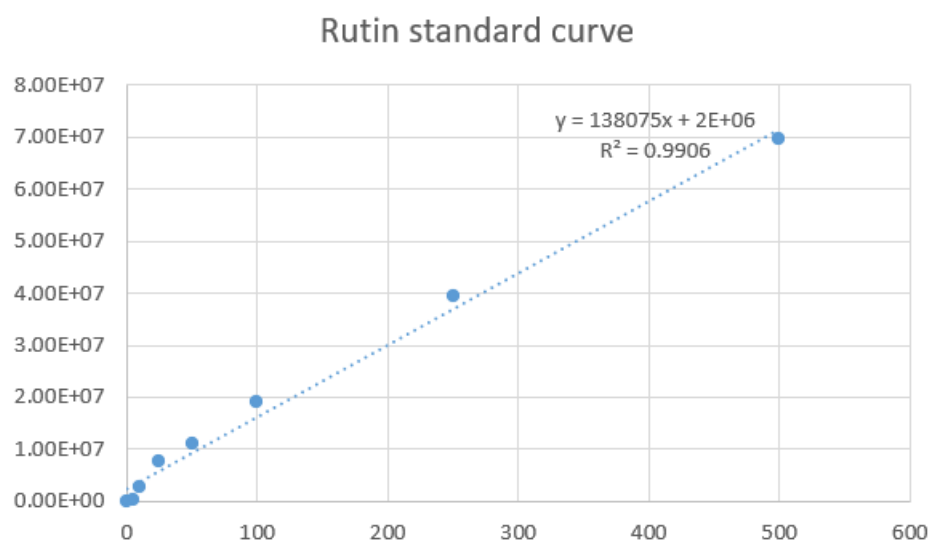

**Figure S8.** The RUTIN standard curve. The standard curve of total flavone plotted by seven Rutin standard substances with different concentrations (5ng/ml, 10ng/ml, 25ng/ml, 50ng/ml, 100ng/ml, 250ng/ml, 500ng/ml).

**Table S1** List of primers used in this study.

| Gene         | Sequence (5'-3')       |
|--------------|------------------------|
| 18srRNA-F    | GAGAAACGGCTACCACATCCAA |
| 18srRNA-R    | TCGTTTGAGCCCGTATTGTTA  |
| CtF3'5'H1-F  | AGATGAACCTTGCACAGTTGGC |
| CtF3'5'H1-R  | ACGGCTCAGACCAGTTTTTGG  |
| CtF3'5'H2-F  | CGTCGCTAGCAATGCAAGTTG  |
| CtF3'5'H2-R  | ATGGCTACTACAATCCCGGCA  |
| CtF3'5'H3-F  | AAGATCTGGCTCGGAAGCAAG  |
| CtF3'5'H3-R  | AGGTTGCGATTTCGCAAAGG   |
| CtF3'5'H4-F  | ATGGTGGTGGCAAGTGATGAA  |
| CtF3'5'H4-R  | AGCGGTACCATAAAACGACCG  |
| CtF3'5'H5-F  | CGATTGTTGGCTACCTTCCGT  |
| CtF3'5'H5-R  | GCTTCCGAGCCAGATCTTGAA  |
| CtF3'5'H6-F  | ACCTTCGCCAACCGTAATCCT  |
| CtF3'5'H6-R  | TTACGCATGTTACGCCAGTGC  |
| CtF3'5'H7-F  | TGGTCCGAATAACATCGTCGA  |
| CtF3'5'H7-R  | GGAGAGGAACCGGAGGTTGTAA |
| CtF3'5'H8-F  | ACCTTCCGTTTCTTAGCCCTGA |
| CtF3'5'H8-R  | GGCTGCTTATCACGACGAAGAG |
| CtF3'5'H9-F  | AACATTTCCGGTTGCACCCC   |
| CtF3'5'H9-R  | AAAGACGGTACAGCCCTTTGG  |
| CtF3'5'H10-F | CCATTTCTAGGCCCTAACCTGC |
| CtF3'5'H10-R | ACCACGATGTGGAGCTTACTGC |
| CtF3'5'H11-F | GATCAAACCTCAACGAGGCCGT |
| CtF3'5'H11-R | GCAGCTCAGCCACATGATCAT  |
| CtF3'5'H12-F | TGTGGCTGAGTTGCAGACGAT  |
| CtF3'5'H12-R | TCCCCTGAAGATCCAACCATG  |
| CtF3'5'H13-F | GGTCGCTGAACGTTATGACGA  |
| CtF3'5'H13-R | AAGAAGCTCCACGATCCTCGA  |
